# Supplementary material for: Exploring the variability of PFAS in urban sewage: a comparison of emissions in commercial versus municipal urban areas
Source: Royal Society of Chemistry journal article supplement (doi:10.1039/d4em00415a), 2024-01-01
Supplement: d4em00415a1.pdf [file d4em00415a1.pdf]

Supplementary Information (SI) to the article:

# Exploring the variability of PFAS in urban sewage: A comparison of emissions in commercial versus municipal urban areas

Krlovic N<sup>1\*</sup>, Saracevic E<sup>1</sup>, Derx J<sup>2,3</sup>, Gundacker C<sup>4</sup>, Krampe J<sup>1</sup>, Kreuzinger N<sup>1</sup>, Zessner M<sup>1</sup>, Zoboli O<sup>1</sup>.

<sup>1</sup> Institute for Water Quality and Resource Management, TU Wien, Vienna, Austria

<sup>2</sup> Interuniversity Cooperation Centre for Water and Health (ICC Water & Health), Vienna, Austria

<sup>3</sup> TU Wien, Institute of Hydraulic Engineering and Water Resources Management, Vienna, Austria

<sup>4</sup> Center for Pathobiochemistry and Genetics, Institute of Medical Genetics, Medical University of Vienna, Vienna, Austria

\* Corresponding author

# 1. Analytical Results

Table 1 : PFAS examined in the project, and their corresponding CAS Numbers

| CAS         | PFAS                       |
|-------------|----------------------------|
| 375-22-4    | PFBA                       |
| 307-24-4    | PFHxA                      |
| 375-85-9    | PFHpA                      |
| 335-67-1    | PFOA                       |
| 375-95-1    | PFNA                       |
| 335-76-2    | PFDA                       |
| 2058-94-8   | PFUnDA                     |
| 307-55-1    | PFDoDA                     |
| 72629-94-8  | PFTrDA                     |
| 376-06-7    | PFTeDA                     |
| 375-73-5    | PFBS                       |
| 355-46-4    | PFHxS                      |
| 375-92-8    | PFHpS                      |
| 1763-23-1   | PFOS                       |
| 68259-12-1  | PFNS                       |
| 335-77-3    | PFDS                       |
| 757124-72-4 | 4:2 FTS                    |
| 27619-97-2  | 6:2 FTS                    |
| 39108-34-4  | 8:2 FTS                    |
| 2355-31-9   | N-MeFOSAA                  |
| 2991-50-6   | N-EtFOSAA                  |
| 62037-80-3  | GenX                       |
| 958445-44-8 | ADONA                      |
| 73606-19-6  | 9Cl-PF3ONS / F53 B Major   |
| 83329-89-9  | 11Cl-PF3OUdS / F53 B Minor |
| 31506-32-8  | N-MeFOSA                   |
| 4151-50-2   | N-EtFOSA                   |
| 24448-09-7  | N-MeFOSE                   |
| 1691-99-2   | N-EtFOSE                   |

Note: PFOSA (754-91-6), PFPeA (2706-90-3) and PFPeS (2706-91-4) were excluded from the monitoring campaign, given the poor recovery rates in initial stages of the project.



Table 5 Quantitative results of the ammonium-adjusted loads

| Substance | Sewer M          |                  |                  | Sewer C          |                  |                  | Influent         |                  |                  |
|-----------|------------------|------------------|------------------|------------------|------------------|------------------|------------------|------------------|------------------|
|           | 25 <sup>th</sup> | 50 <sup>th</sup> | 75 <sup>th</sup> | 25 <sup>th</sup> | 50 <sup>th</sup> | 75 <sup>th</sup> | 25 <sup>th</sup> | 50 <sup>th</sup> | 75 <sup>th</sup> |
| PFBA      | 0.34             | 0.45             | 3.52             | 0.18             | 0.68             | 2.60             | 1.16             | 2.06             | 3.64             |
| PFHxA     | 1.12             | 2.67             | 4.38             | 1.12             | 2.68             | 4.37             | 1.25             | 2.69             | 5.71             |
| PFOA      | 0.26             | 0.47             | 0.95             | 0.47             | 0.77             | 1.36             | 0.63             | 0.85             | 1.65             |
| PFBS      | 0.17             | 0.19             | 1.22             | 0.61             | 1.49             | 2.45             | 0.61             | 1.50             | 2.45             |
| PFHxS     | 0.31             | 0.38             | 0.84             | 0.52             | 0.77             | 1.35             | 0.20             | 0.43             | 0.73             |
| PFOS      | 0.27             | 0.57             | 0.74             | 1.03             | 1.23             | 1.59             | 1.49             | 2.16             | 3.16             |
| 6:2 FTS   | 0.25             | 0.41             | 0.59             | 0.72             | 1.00             | 1.86             | 3.60             | 4.63             | 5.55             |

## 2. Details regarding analytical methods – PFAS

Table 6 Instrument information

| Instruments       | Manufacturer | Description                                        |
|-------------------|--------------|----------------------------------------------------|
| LC system         | PAL          | PAL RTC                                            |
|                   | Agilent      | Agilent 1260 Infinity II                           |
| MS/MS system      | Sciex        | Qtrap 6500+                                        |
| Analytical Column | Phenomenex   | Phenomenex Luna Omega 3 µm PS C18 ; 150x5 , 100 Å  |
| Delay Column      | Phenomenex   | phenomenex Luna C18 50x3 mm 110 Å                  |
| SPE Tubes         | Phenomenex   | Strata-X-AW 33µm Polymeric Weak Anion, 200 mg/6 mL |

Table 7 Material information

| Material                               | Manufacturer   | Description                   |
|----------------------------------------|----------------|-------------------------------|
| Polypropylene Vials, 1.5 mL, screw cap | Macherey&Nagel | Short thread vial             |
| Polypropylene Sample Flasks            | Azlon          | Rinsed with Acid, Base and DW |
| Pipettes                               | Eppendorf SE   | 10 µL- 5000 µL                |

Table 8 Chemicals used

| Chemical          | Manufacturer | Description                        |
|-------------------|--------------|------------------------------------|
| Methanol          | Merck        | CAS 67-56-1 (Merck, 20864.290)     |
| Ultra-Pure Water  | MiliQ TUW    | MiliQ TUW                          |
| Ammoniumhydroxyde | Merck        | CAS 1335-21-6; (Merck1.05432.1000) |

Table 9 Analytical standards

| Material                                       | Manufacturer            | Description                                |
|------------------------------------------------|-------------------------|--------------------------------------------|
| PFAS-Standards (Mix and Single Substances)     | Wellington Laboratories | PFAC30PAR 1 mg/L<br>MXI 1mg/L,             |
| Internal Standards (Mix and Single Substances) | Wellington Laboratories | MPFAC-HIF-IS 1 mg/L<br>MPFAC-HIF-ES 1 mg/L |

### 3. Analytical Process

For extraction and enrichment of samples, a solid phase extraction (SPE) of the samples should be performed. To enrich PFAS in samples an aliquot of 100 mL is spiked with internal standard solution (EIS) and extracted via manual SPE. The exact steps are presented in Table 10.

Table 10 Preparation steps for PFAS analysis

| Step            | Details                                                                                                                                                                        |
|-----------------|--------------------------------------------------------------------------------------------------------------------------------------------------------------------------------|
| 1. Conditioning | <ol style="list-style-type: none"><li>2 mL MeOH</li><li>2 mL Ultra-Pure Water</li></ol>                                                                                        |
| 2. Loading      | <ol style="list-style-type: none"><li>Loading Volume: 100 mL, influent WWTP</li><li>Loading Speed: 10 mL/min</li></ol>                                                         |
| 3. Washing      | <ol style="list-style-type: none"><li>1 mL 25 mM Ammonium acetate in Ultra-Pure-Water</li></ol>                                                                                |
| 4. Drying       | <ol style="list-style-type: none"><li>Put cartridges in falcon tubes and centrifuge at 4000 rpm for 6 min.</li></ol>                                                           |
| 5. Elution      | <ol style="list-style-type: none"><li>2x1 mL MeOH (+1% NH<sub>4</sub>OH), each into appropriate glass vessel using pressurized air</li><li>Elution Speed: 0.8 mL/min</li></ol> |
| 6. Transfer     | <ol style="list-style-type: none"><li>1 mL of the eluate into a HPLC vial</li></ol>                                                                                            |

After application of SPE 2 mL of the eluate with MeOH (+1% NH<sub>4</sub>OH) is collected. 1 mL of the eluate was transferred to polypropylene vials (1.5 mL) and spiked with 50 µL of the internal standard solution (NIS).

For direct injection, an external calibration was used for quantification. At least five different concentrations were diluted with methanol from the standard solution. The concentrations in the vial ranged from 50 ng L<sup>-1</sup> to 1000 ng L<sup>-1</sup>. Additionally, the non-extracted internal standards (NIS) and extracted internal standards (EIS) were also added to each calibration solution. EIS was used in order to establish recovery (Figure 2), and NIS was used to establish the initial calibration (Figure 1). The exact assignment of internal standards to native substances is seen in Table 11.

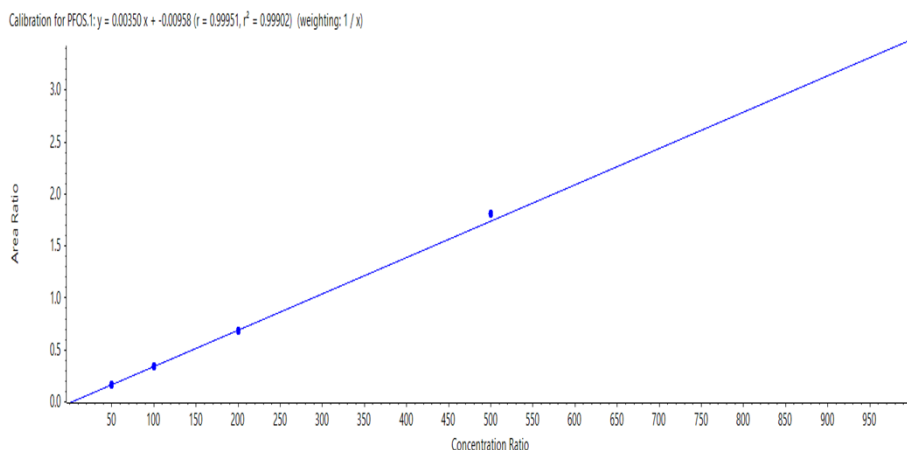

Figure 1 : Example of an external calibration curve using internal standards, per the EPA 1633 norm. The compound, in this case, is PFOS in a wastewater matrix.

Table 11 : Assignment of internal standards (EIS and NIS) to native substance

|                                                 | Native                              | EIS             | NIS         |             |
|-------------------------------------------------|-------------------------------------|-----------------|-------------|-------------|
| Perfluoroalkyl carboxylic acids (PFCAs)         | PFBA                                | M3PFBA_13C4     | M3PFBA_13C3 |             |
|                                                 | PFHxA                               | M5PFHxA_13C5    | MPFHxA_13C2 |             |
|                                                 | PFHpA                               | M4PFHpA_13C4    |             |             |
|                                                 | PFOA                                | M8PFOA_13C8     | MPFOA_13C4  |             |
|                                                 | PFNA                                | M9PFNA_13C9     | MPFNA_13C5  |             |
|                                                 | PFDA                                | M6PFDA_13C6     | MPFDA_13C2  |             |
|                                                 | PFUdA                               | M7PFUdA_13C7    |             |             |
|                                                 | PFDoA                               | MPFDoA_13C2     |             |             |
|                                                 | PFTeDA                              | M2PFTeDA_13C2   |             |             |
|                                                 | Perfluoroalkyl sulfonic acid (PFSA) | PFBS            | M3PFBS_13C3 | MPFHxS_18O2 |
| PFHxS                                           |                                     | M3PFHxS_13C3    |             |             |
| PFHpS                                           |                                     |                 |             |             |
| PFOS                                            |                                     | M8PFOS_13C8     | MPFOS_13C4  |             |
| PFNS                                            |                                     |                 |             |             |
| PFDS                                            |                                     |                 |             |             |
| Fluorotelomer sulfonic acid (n:2 FTCA)          | 4:2 FTS                             | M2-4:2 FTS_13C2 |             | MPFOS_13C4  |
|                                                 | 6:2 FTS                             | M2-6:2 FTS_13C2 |             |             |
|                                                 | 8:2 FTS                             | M2-8:2 FTS_13C2 |             |             |
|                                                 | N-MeFOSA                            | d-N-MeFOSA_d3   |             |             |
|                                                 | N-EtFOSA                            | d-N-EtFOSA_d5   |             |             |
| Perfluoroalkane sulfonamido acetic acid (FASAA) | N-MeFOSAA                           | d3-N-MeFOSAA    | MPFHxA_13C2 |             |
|                                                 | N-EtFOSAA                           | d5-N-EtFOSAA    |             |             |
|                                                 | HFPO-DA                             | M3HPFO-DA_13C3  |             |             |

|                                |            |              |              |            |
|--------------------------------|------------|--------------|--------------|------------|
| Perfluoroether<br>acid (PFECA) | carboxylic | ADONA        | MPFDoA_13C2  | MPFOA_13C4 |
|                                |            | 9Cl-PF3ONS   | M3PFHxS_13C3 | MPFOS_13C4 |
|                                |            | 11Cl-PF3OUdS | M3PFHxS_13C3 |            |
|                                |            | N-MeFOSE     | d7-N-MeFOSE  | MPFOS_13C4 |
|                                |            | N-EtFOSE     | d9-N-EtFOSE  |            |

After 12 injections, a calibration standard series was made, in order to test the stability of the system and determine the limit of quantification.

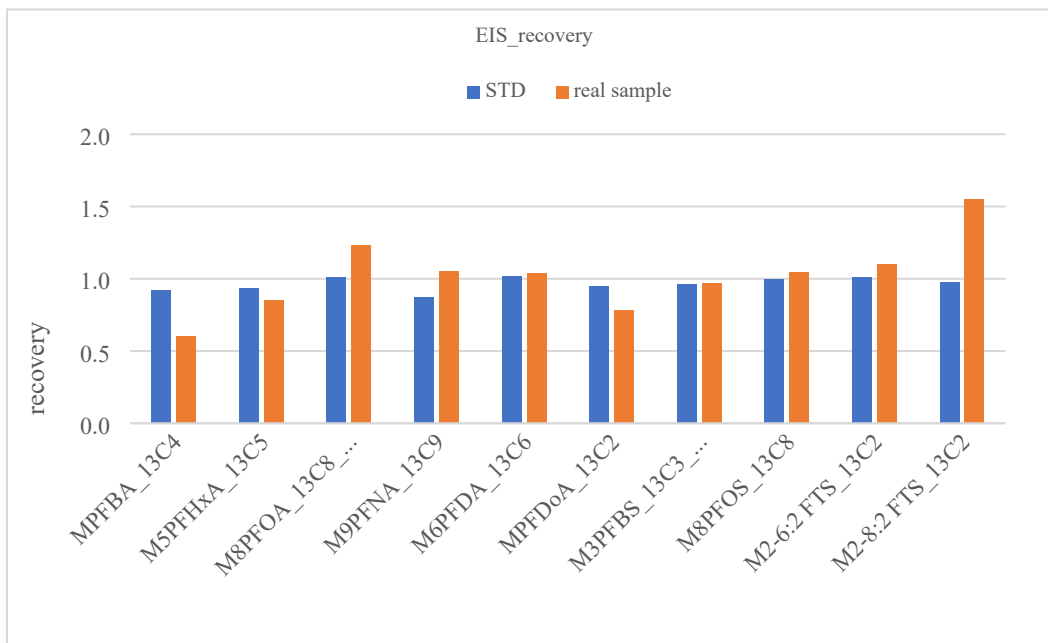

Figure 2: Example of recovery determination for PFAS analysis for standard solutions, versus real samples, according to the EPA 1633 norm.

A PAL RTC sampler was used for injection, an Agilent 1290 Infinity II HPLC (Agilent 2021) pump was used for separation, whereas the Sciex Qtrap 6500+ (SCIEX 2021) with electrospray ionization source was used for measurement. A Phenomenex Luna Omega 3  $\mu\text{m}$  PS C18 100 x 3.0 mm 100  $\text{\AA}$  was used at a temperature of 40  $^{\circ}\text{C}$  and an injection volume of 40  $\mu\text{L}$ , for the analytical column. Furthermore, the Phenomenex Luna C18 50 x 3 mm 110  $\text{\AA}$  delay column (Phenomenex 2023) was installed. The test and optimisation of injection volume for LCMS system was made (Figure 3).



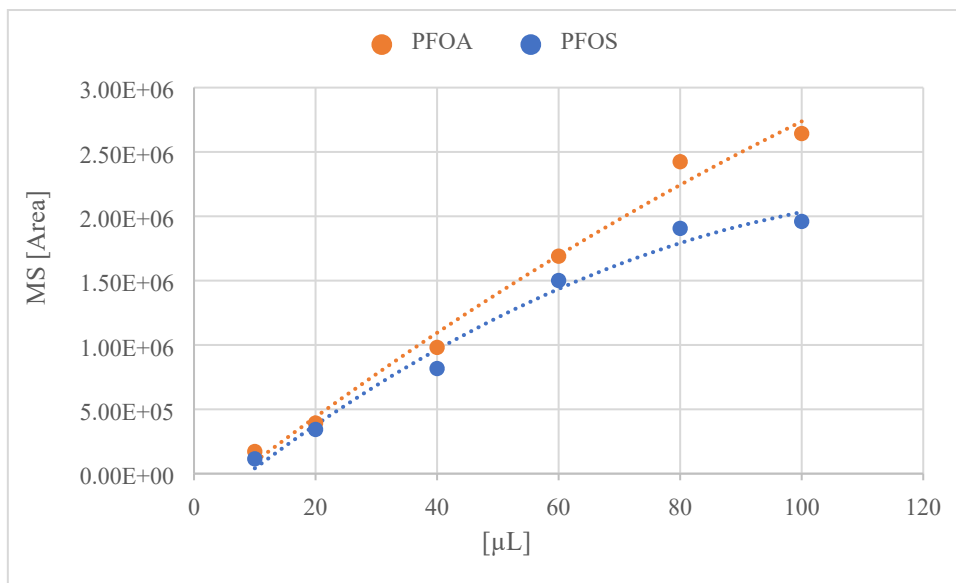

Figure 3 : An example of optimization injection volume for LCMS PFAS analysis

The separation is achieved by using a binary gradient mobile phase consisting of ultra-pure water with 20 mM Ammonium acetate buffer (A) and HPLC-MS grade methanol (B) at a constant flow of 0.6 mL min<sup>-1</sup>. The conditions of the gradient are shown in Table 12.

Table 12 Gradient conditions for the analysis in this study

| Time  | Mobile phase A | Mobile phase B | Flow   |
|-------|----------------|----------------|--------|
| min   | %              |                | mL/min |
| 0.00  | 90             | 10             | 0.600  |
| 1.50  | 35             | 65             | 0.600  |
| 8.00  | 5              | 95             | 0.600  |
| 8.10  | 1              | 99             | 0.600  |
| 12.00 | 1              | 99             | 0.600  |
| 12.10 | 90             | 10             | 0.600  |
| 16.00 | 90             | 10             | 0.600  |

The mass spectrometer ESI was operating in negative ion mode using multiple reaction monitoring (MRM) for the components, as shown in Table 13. The capillary voltage was set to -3000 V. The sheath gas temperature was 350 °C, and the drying gas temperature was 80 °C.

Table 13 : details regarding mass spectrometry

| Name         | Q1 mass | Q3 mass         |                 | dwell time | DP  | EP  | CP   | CXP |
|--------------|---------|-----------------|-----------------|------------|-----|-----|------|-----|
|              |         | Fragment Mass 1 | Fragment Mass 2 |            |     |     |      |     |
|              |         | (m/z)           |                 | ms         | V   |     |      |     |
| PFBA         | 213     | 169             |                 | 10         | -5  | -10 | -12  | -9  |
| PFHxA        | 313     | 269             | 119             | 10         | -30 | -10 | -13  | -10 |
| PFHpA        | 363     | 319             | 169             | 10         | -30 | -10 | -15  | -15 |
| PFOA         | 413     | 369             | 219             | 10         | -30 | -10 | -16  | -15 |
| PFNA         | 463     | 419             | 218.9           | 10         | -30 | -10 | -16  | -20 |
| PFDA         | 513     | 469             | 269             | 10         | -30 | -10 | -18  | -20 |
| PFUdA        | 563     | 519             | 269             | 10         | -30 | -10 | -19  | -20 |
| PFDoA        | 613     | 569             | 319             | 10         | -30 | -10 | -19  | -20 |
| PFTTrDA      | 663     | 619             | 169             | 10         | -30 | -10 | -20  | -20 |
| PFTeDA       | 713     | 669             | 169             | 10         | -30 | -10 | -21  | -20 |
| PFBS         | 299     | 80              | 99              | 10         | -30 | -10 | -64  | -4  |
| PFHxS        | 399     | 80              | 99              | 10         | -30 | -10 | -95  | -10 |
| PFHpS        | 449     | 80              | 99              | 10         | -3  | -10 | -94  | -10 |
| PFOS         | 499     | 80              | 99              | 10         | -30 | -10 | -80  | -10 |
| PFNS         | 549     | 80              | 99              | 10         | -30 | -10 | -107 | -15 |
| PFDS         | 599     | 80              | 99              | 10         | -30 | -10 | -118 | -15 |
| 4:2 FTS      | 327     | 307             | 81              | 10         | -30 | -10 | -29  | -15 |
| 6:2 FTS      | 427     | 407             | 81              | 10         | -30 | -10 | -35  | -15 |
| 8:2 FTS      | 527     | 507             | 81              | 10         | -30 | -10 | -18  | -15 |
| N-MeFOSAA    | 570     | 419             |                 | 10         | -30 | -10 | -29  | -15 |
| N-EtFOSAA    | 584     | 419             | 526             | 10         | -30 | -10 | -30  | -15 |
| HFPO-DA      | 285,1   | 169,1           | 329             | 10         | -30 | -10 | -11  | -15 |
| ADONA        | 377     | 251             | 85              | 10         | -30 | -10 | -17  | -20 |
| 9Cl-PF3ONS   | 531     | 351             |                 | 10         | -30 | -10 | -38  | -20 |
| 11Cl-PF3OUdS | 631     | 451             | 199             | 10         | -30 | -10 | -43  | -20 |
| N-MeFOSE     | 616     | 59              |                 | 10         | -30 | -10 | -83  | -20 |
| N-EtFOSE     | 630     | 59              |                 | 10         | -30 | -10 | -70  | -20 |

The analysis of the measurements is performed with Sciex Analyst 1.8 and OS Software .

## 4. Water quality parameters – NH<sub>4</sub><sup>+</sup> and COD

Table 14 represents the monthly average values of ammonium and chemical oxygen demand for each observed area. Data were obtained from the responsible city authorities, and no analytical method was conducted within the scope of this work, with respect to these parameters. The ammonium-adjusted PFAS per-person loads are presented in Table 15

*Table 14 : NH<sub>4</sub>-N and COD measurements during the monitoring campaign*

| Month | Ammonium-Nitrogen [mg L <sup>-1</sup> ] |         |          | COD [mg L <sup>-1</sup> ] |         |          |
|-------|-----------------------------------------|---------|----------|---------------------------|---------|----------|
|       | Sewer M                                 | Sewer C | Influent | Sewer M                   | Sewer C | Influent |
| Jan   | 61,1                                    | 39,1    | 52,5     | 1574                      | 711     | 762      |
| Feb   | 61,6                                    | 38,5    | 43,9     | 1122                      | 949     | 791      |
| Mar   | 65,2                                    | 45,6    | 47,7     | 1195                      | 973     | 779      |
| Apr   | 55,8                                    | 32,3    | 39,6     | 981                       | 509     | 727      |
| May   | 63,6                                    | 33,2    | 38,0     | 1112                      | 637     | 754      |
| Jun   | 48,1                                    | 27,7    | 37,2     | 1582                      | 566     | 700      |
| Jul   | 45,3                                    | 32,2    | 36,1     | 1390                      | 642     | 666      |
| Sep   | 34,0                                    | 36,6    | 35,5     | 1096                      | 818     | 691      |
| Oct   | 44,5                                    | 36,8    | 37,7     | 944                       | 814     | 684      |
| Nov   | 49,3                                    | 32,6    | 41,9     | 1131                      | 999     | 850      |
| Dec   | 48,0                                    | 34,4    | 41,8     | 1334                      | 726     | 801      |

Table 15 : Ammonium-adjusted per-person loads

| Substance | Sewer    | 25 <sup>th</sup> Percentile | 50 <sup>th</sup> Percentile | 75 <sup>th</sup> Percentile |
|-----------|----------|-----------------------------|-----------------------------|-----------------------------|
| PFBA      | C        | 0.18                        | 0.68                        | 2.60                        |
| PFHxA     | C        | 1.12                        | 2.68                        | 4.37                        |
| PFOA      | C        | 0.47                        | 0.77                        | 1.36                        |
| PFNA      | C        | 0.15                        | 0.17                        | 0.46                        |
| PFDA      | C        | 0.09                        | 0.11                        | 0.26                        |
| PFBS      | C        | 0.61                        | 1.49                        | 2.45                        |
| PFHxS     | C        | 0.52                        | 0.77                        | 1.35                        |
| PFOS      | C        | 1.03                        | 1.23                        | 1.59                        |
| PFDS      | C        | 0.048                       | 0.053                       | 0.31                        |
| 6:2 FTS   | C        | 0.72                        | 1.00                        | 1.86                        |
| 8:2 FTS   | C        | -                           | -                           | -                           |
| ADONA     | C        | -                           | -                           | -                           |
| PFBA      | M        | 0.34                        | 0.45                        | 3.52                        |
| PFHxA     | M        | 1.12                        | 2.67                        | 4.38                        |
| PFOA      | M        | 0.26                        | 0.47                        | 0.95                        |
| PFNA      | M        | -                           | -                           | -                           |
| PFDA      | M        | 0.038                       | 0.046                       | 0.21                        |
| PFBS      | M        | 0.17                        | 0.19                        | 1.22                        |
| PFHxS     | M        | 0.31                        | 0.38                        | 0.84                        |
| PFOS      | M        | 0.27                        | 0.57                        | 0.74                        |
| PFDS      | M        | 0.08                        | 0.34                        | 0.77                        |
| 6:2 FTS   | M        | 0.25                        | 0.41                        | 0.59                        |
| 8:2 FTS   | M        | 0.07                        | 0.09                        | 0.15                        |
| ADONA     | M        | 0.01                        | 0.05                        | 0.12                        |
| PFBA      | Influent | 1.16                        | 2.06                        | 3.64                        |
| PFHxA     | Influent | 1.25                        | 2.69                        | 5.71                        |
| PFOA      | Influent | 0.63                        | 0.85                        | 1.65                        |
| PFNA      | Influent | 0.17                        | 0.18                        | 0.81                        |
| PFDA      | Influent | 0.12                        | 0.18                        | 0.33                        |
| PFBS      | Influent | 0.61                        | 1.50                        | 2.45                        |
| PFHxS     | Influent | 0.20                        | 0.43                        | 0.73                        |
| PFOS      | Influent | 1.49                        | 2.16                        | 3.16                        |
| PFDS      | Influent | -                           | -                           | -                           |
| 6:2 FTS   | Influent | 3.60                        | 4.63                        | 5.55                        |
| 8:2 FTS   | Influent | 0.17                        | 0.18                        | 0.24                        |
| ADONA     | Influent | 0.03                        | 0.13                        | 0.16                        |

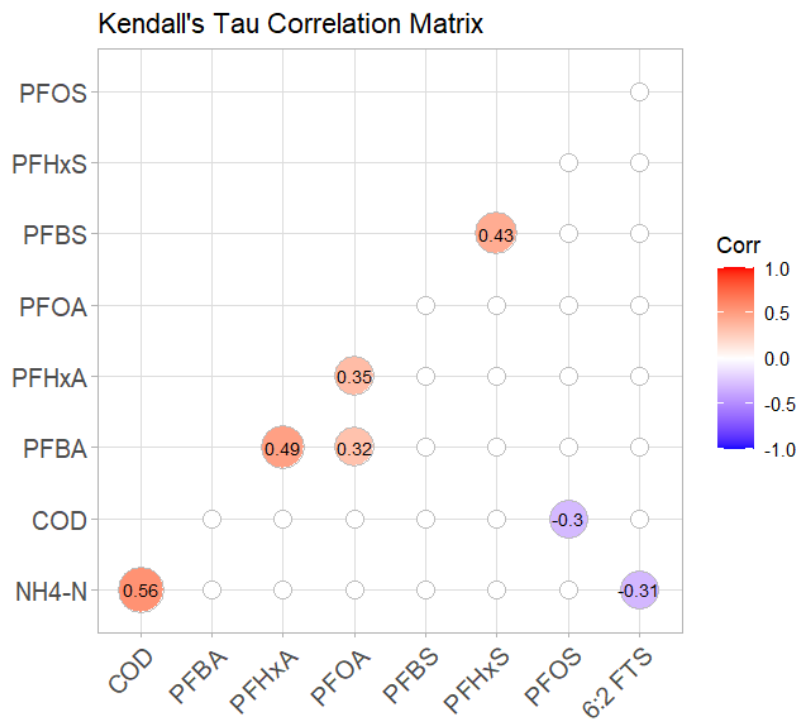

Figure 4 : Kendall's Tau Correlation Matrix, used for the quantification of the PCA results. Only significant correlations ( $p < 0.05$ ) are presented.

## References

- Agilent. 2021. "Agilent 1290 Infinity II HPLC Pump." 2021.  
<https://www.agilent.com/en/product/liquid-chromatography/hplc-components-accessories/hplc-pumps/1290-infinity-ii-high-speed-pump#literature>.
- Phenomenex. 2023. "Luna Omega HPLC/UHPLC LC Columns." 2023.  
<https://www.phenomenex.com/products/luna-omega-hplc-column>.
- SCIEX. 2021. "QTRAP® 6500 LC-MS/MS System." 2021. <https://sciex.com/products/mass-spectrometers/qtrap-systems/qtrap-6500-system>.
